# Supplementary material
Source: PubMed Central journal article supplement (PMC4704603)
Supplement: supp_pp.15.01617_PP2015-01617DR1_Supplemental_Figure_1.pdf [file supp_pp.15.01617_PP2015-01617DR1_Supplemental_Figure_1.pdf]

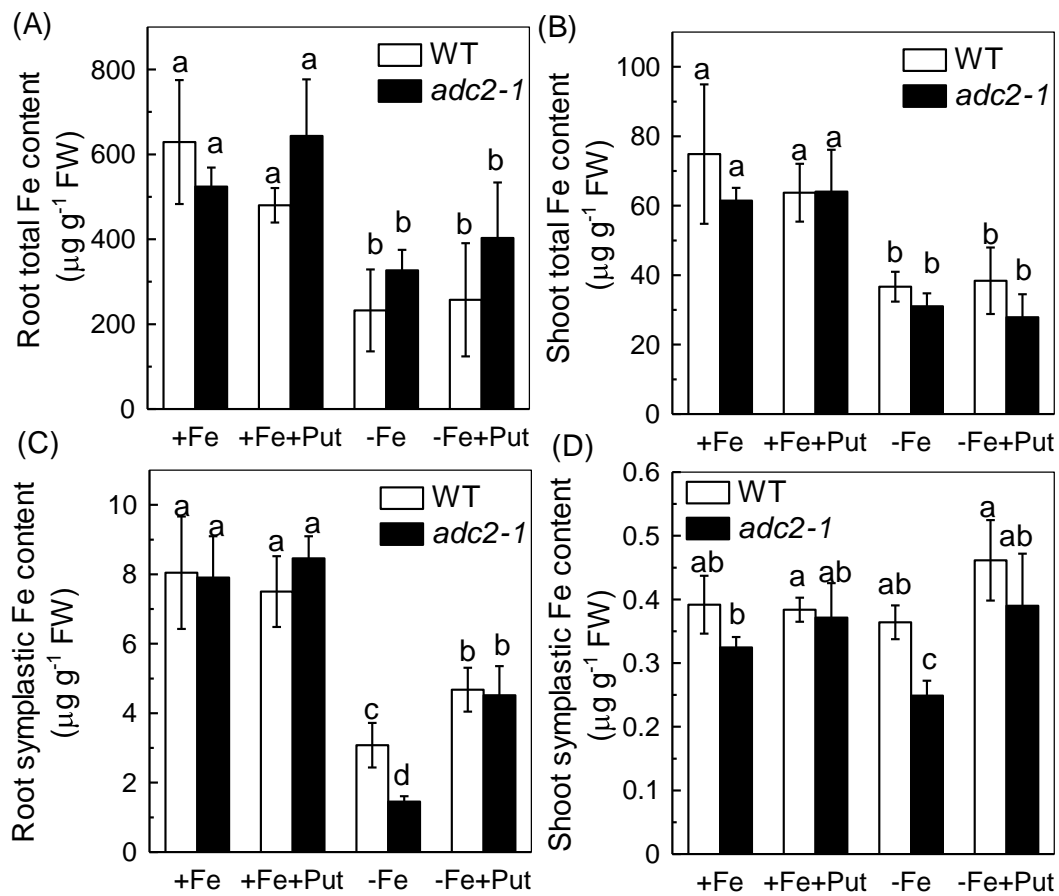

Supplemental Figure 1. Effect of endogenous and exogenous Put on Fe-deficiency symptoms in Arabidopsis. Six-week-old WT and *adc2-1* were placed in -Fe or +Fe medium with or without 0.1 mM Put for 7 d, and root and shoot samples were taken to measure the root total Fe content (A), shoot total Fe content (B), root symplastic Fe content (C) and shoot symplastic Fe content (D). Error bars represent  $\pm$ SD (n = 4). Different letters represent significant difference at  $P < 0.05$ .
