# Supplementary material
Source: PubMed Central journal article supplement (PMC4704603)
Supplement: supp_pp.15.01617_PP2015-01617DR1_Supplemental_Figure_2.pdf [file supp_pp.15.01617_PP2015-01617DR1_Supplemental_Figure_2.pdf]

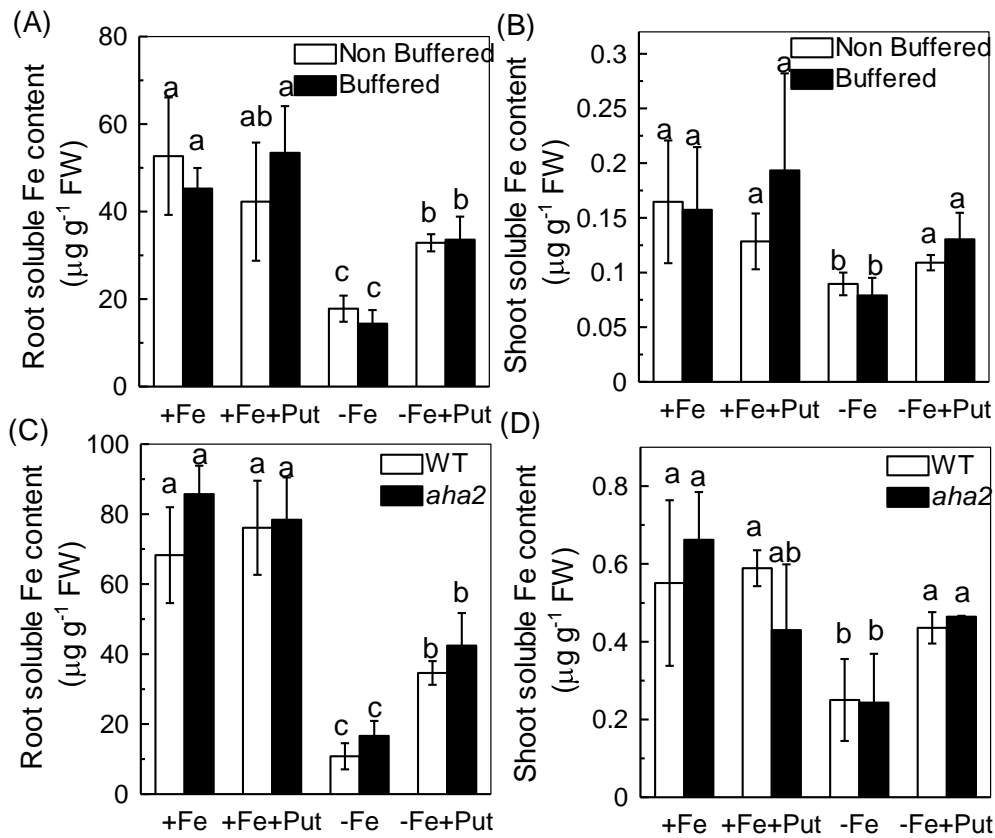

Supplemental Figure 2. Effect of pH on the Put-mediated alleviation of Fe-deficiency in Arabidopsis. The root soluble Fe content (A) and shoot soluble Fe content (B) were measured after six-week-old WT placed in -Fe or +Fe medium in the presence or absence of 0.1 mM Put buffered with 10 mM MES or not for 7 d. The pH was maintained at 5.6. Error bars represent  $\pm$ SD ( $n = 4$ ). Different letters represent significant difference at  $P < 0.05$ . The root soluble Fe content (C) and shoot soluble Fe content (D) were measured after six-week-old WT and *aha2* were placed in -Fe or +Fe medium in the presence or absence of 0.1 mM Put for 7 d. Error bars represent  $\pm$ SD ( $n = 4$ ). Different letters represent significant difference at  $P < 0.05$ .
